# Supplementary material for: Design of non-transition-metal-doped nanoribbon catalysis to achieve efficient nitrogen fixation
Source: Royal Society of Chemistry journal article supplement (doi:10.1039/d1ma00518a), 2021-01-01
Supplement: d1ma00518a1.pdf [file d1ma00518a1.pdf]

**Supporting Information for “Design for non-transition metal  
doped nanoribbons catalysis to achieve efficient nitrogen fixation”**

*Jiale Qu<sup>a</sup>, Xiang Feng<sup>a</sup>, Tianshuai Wang<sup>a</sup>, Ziqi Li<sup>a</sup>, Chao Lin<sup>a</sup>, Xiaopeng  
Liu<sup>a</sup>, Dominik Legut<sup>b</sup>, Qianfan Zhang<sup>a\*</sup>*

*a. School of Materials Science and Engineering, Beihang University, Beijing 100191,  
P. R. China.*

*b. IT4Innovations, VSB-Technical University of Ostrava, 17. listopadu 2172/15, CZ-  
70800 Ostrava, Czech Republic.*

**\*Corresponding authors:** [qianfan@buaa.edu.cn](mailto:qianfan@buaa.edu.cn)

**Table S1.** Limiting Potential and corresponding Potential determining step for 16 SAC@GNR systems.

| SAC | Lowest Limiting Potential(eV) | Potential determining step          | Optimal Hydrogenation Mechanism |
|-----|-------------------------------|-------------------------------------|---------------------------------|
| Be  | -0.59                         | *N <sub>2</sub> → *NNH              | alternating                     |
| B   | -1.11                         | *NH <sub>2</sub> → *NH <sub>3</sub> | alternating                     |
| C   | -0.89                         | *NH <sub>2</sub> → *NH <sub>3</sub> | distal/alternating              |
| N   | -1.18                         | *N <sub>2</sub> → *NNH              | distal                          |
| Mg  | -1.19                         | *N <sub>2</sub> → *NNH              | alternating                     |
| Al  | -1.04                         | *NH <sub>2</sub> → *NH <sub>3</sub> | alternating                     |
| Si  | -0.45                         | *N <sub>2</sub> → *NNH              | alternating                     |
| P   | -1.01                         | *N <sub>2</sub> → *NNH              | alternating                     |
| Ca  | -0.91                         | *N <sub>2</sub> → *NNH              | alternating                     |
| Ga  | -0.67                         | *NH <sub>2</sub> → *NH <sub>3</sub> | alternating                     |
| Ge  | -1.54                         | *N <sub>2</sub> → *NNH              | distal/alternating              |
| As  | -1.13                         | *N <sub>2</sub> → *NNH              | distal/alternating              |
| Sr  | -1.11                         | *N <sub>2</sub> → *NNH              | alternating                     |
| In  | -0.97                         | *N <sub>2</sub> → *NNH              | alternating                     |
| Sn  | -1.69                         | *N <sub>2</sub> → *NNH              | alternating                     |
| Sb  | -1.01                         | *N <sub>2</sub> → *NNH              | alternating                     |

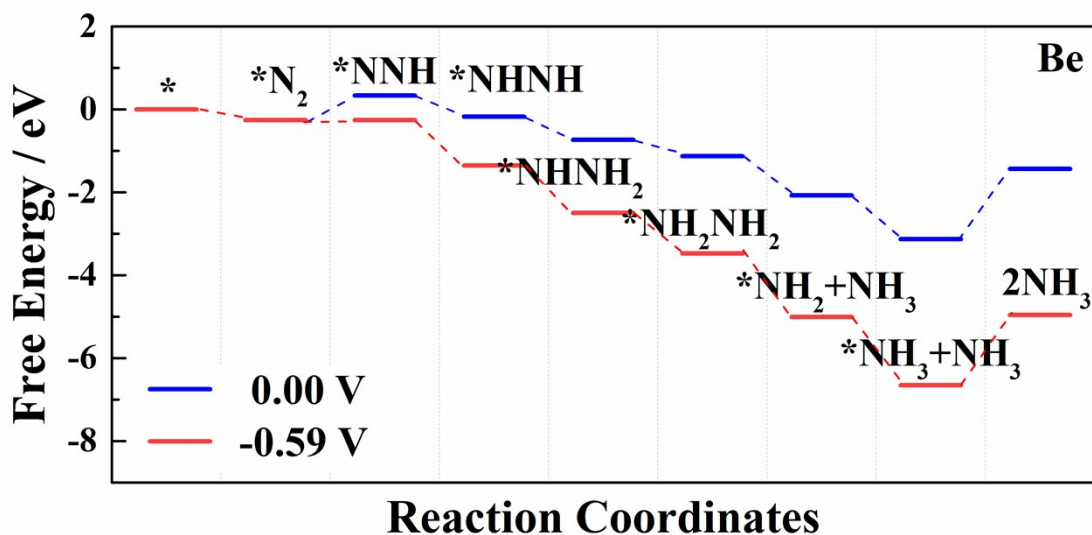

Figure S1. Free energy evolution process for Be@GNR system.

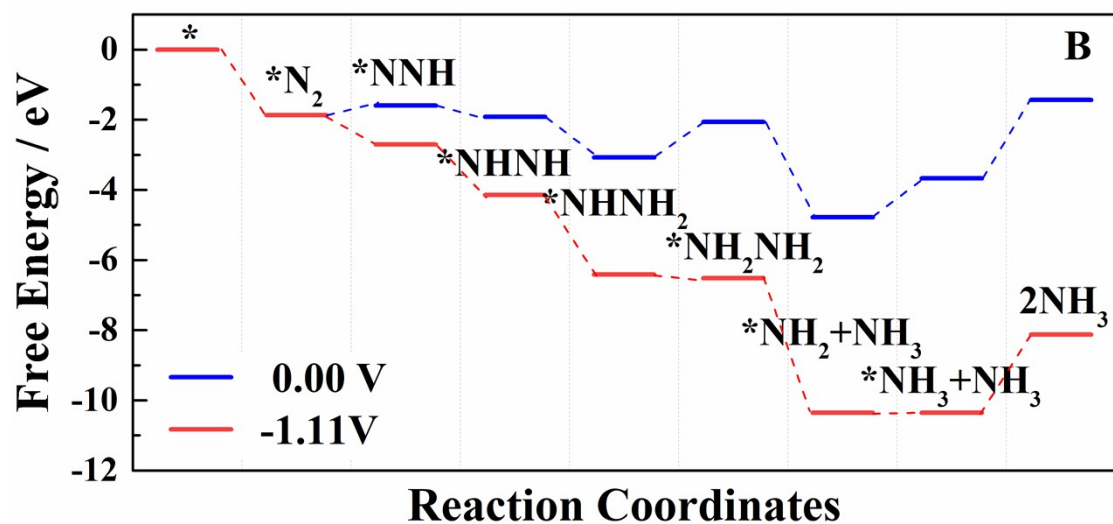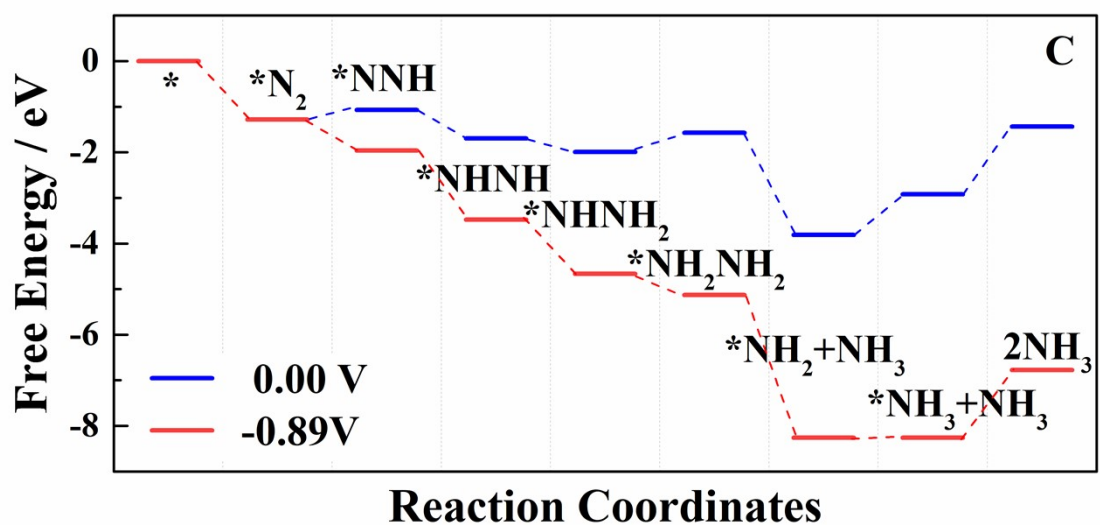

Figure S2. Free energy evolution process for B@GNR system.

Figure S3. Free energy evolution process for C@GNR system.

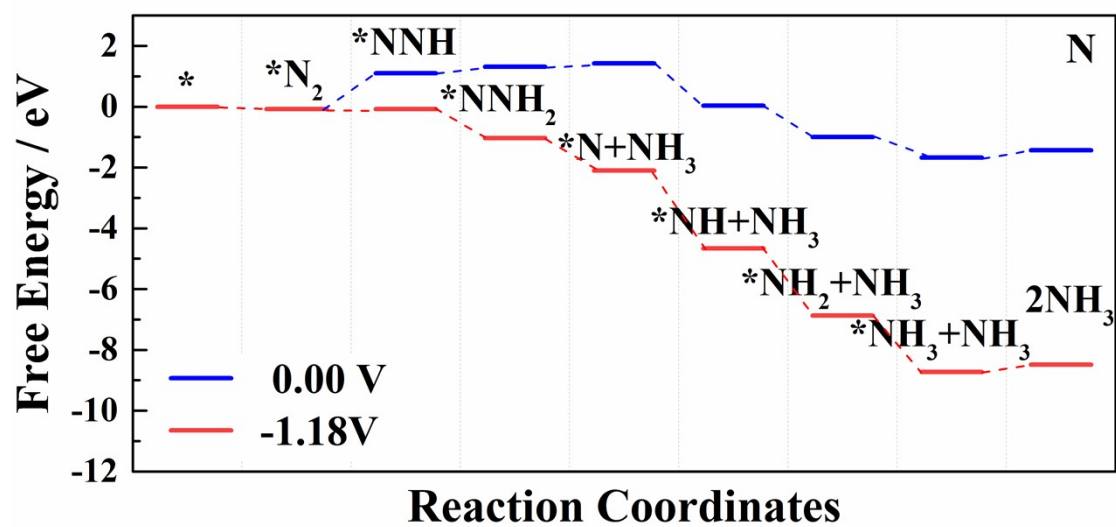

Figure S4. Free energy evolution process for N@GNR system.

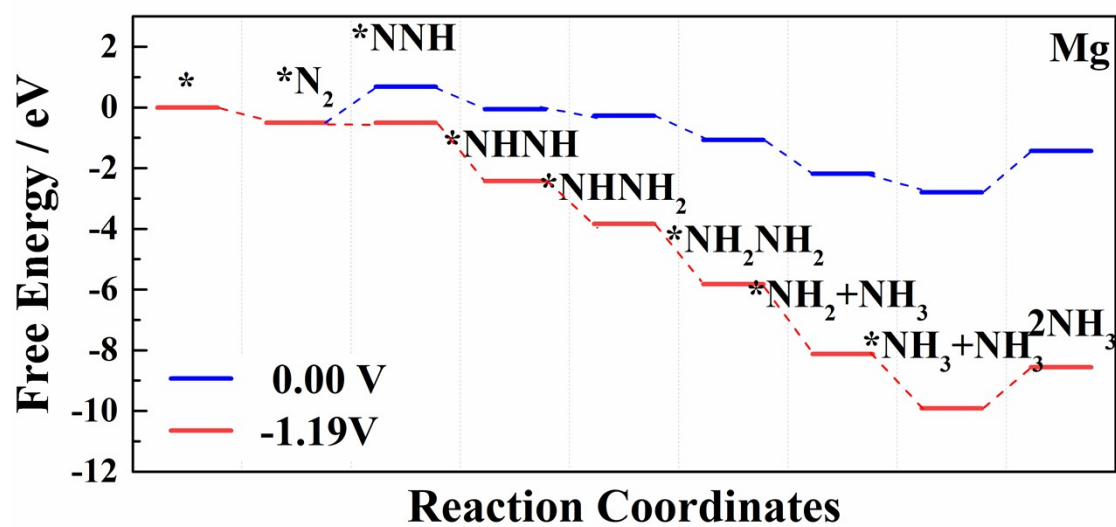

Figure S5. Free energy evolution process for Mg@GNR system.

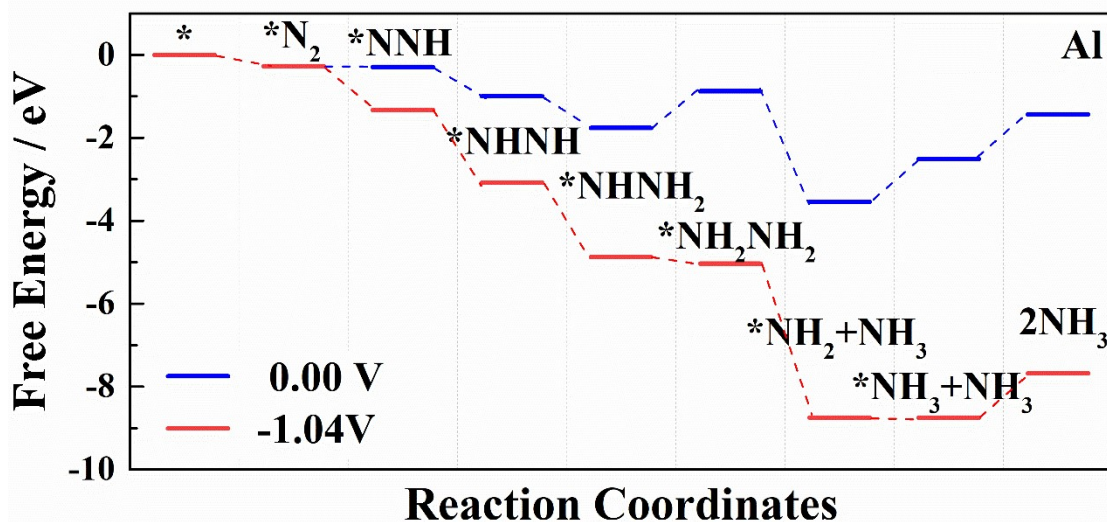

Figure S6. Free energy evolution process for Al@GNR system.

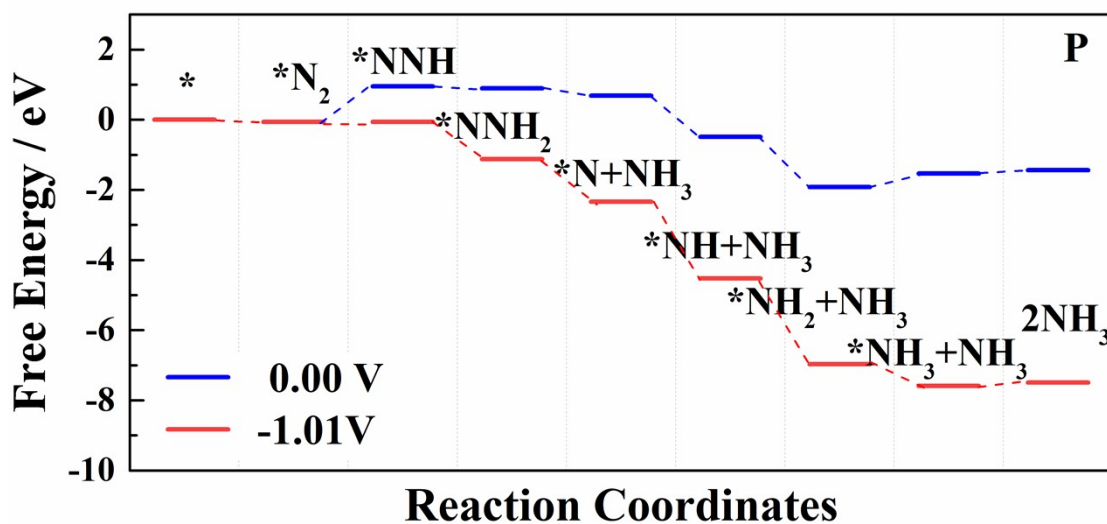

Figure S7. Free energy evolution process for P@GNR system.

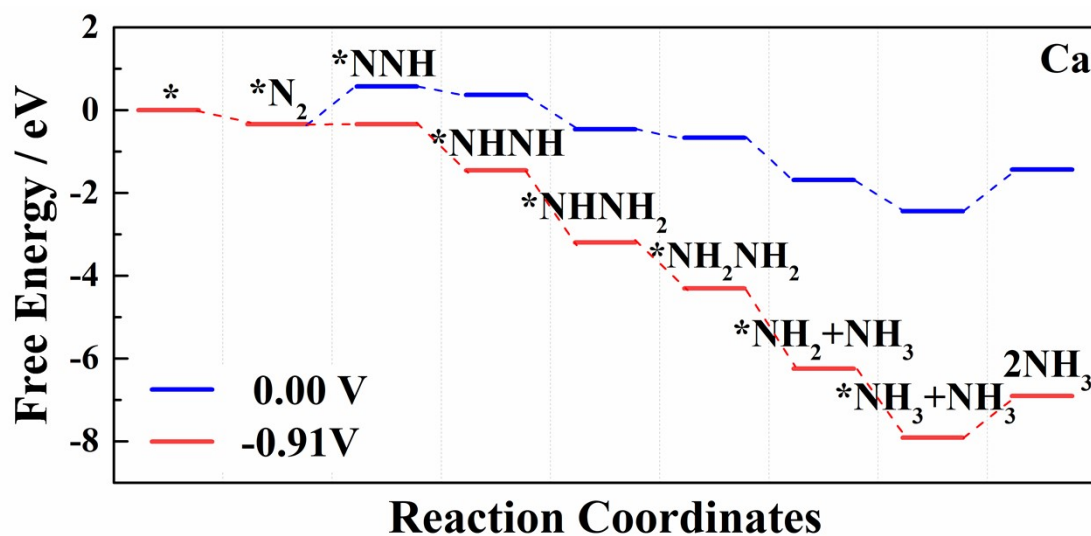

Figure S8. Free energy evolution process for Ca@GNR system.

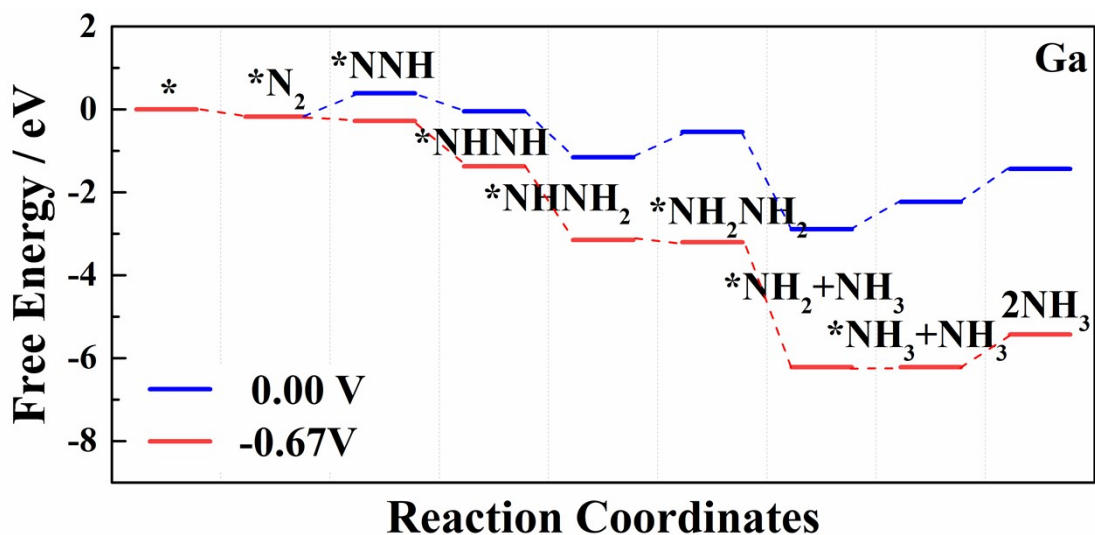

Figure S9. Free energy evolution process for Ga@GNR system.

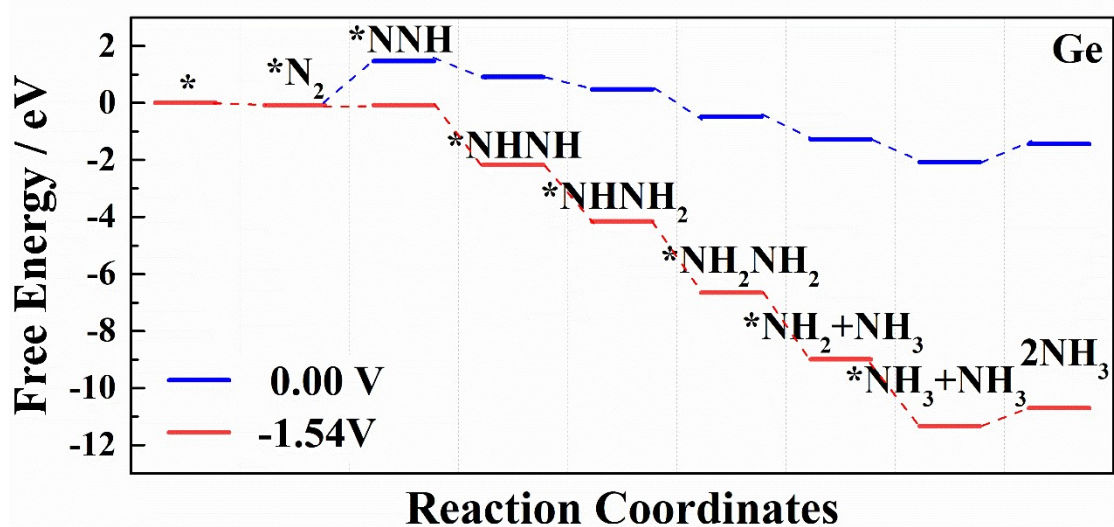

Figure S10. Free energy evolution process for Ge@GNR system.

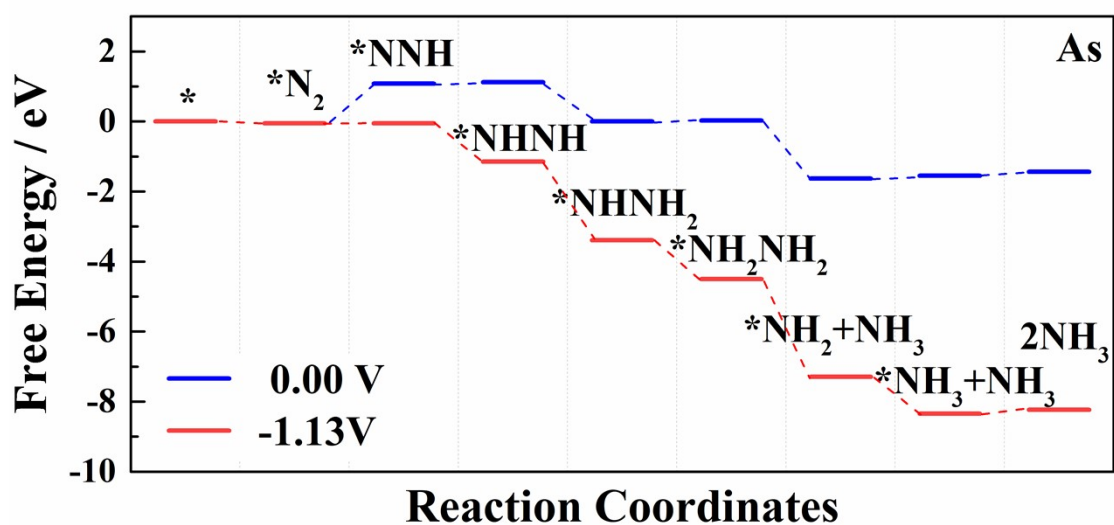

Figure S11. Free energy evolution process for As@GNR system.



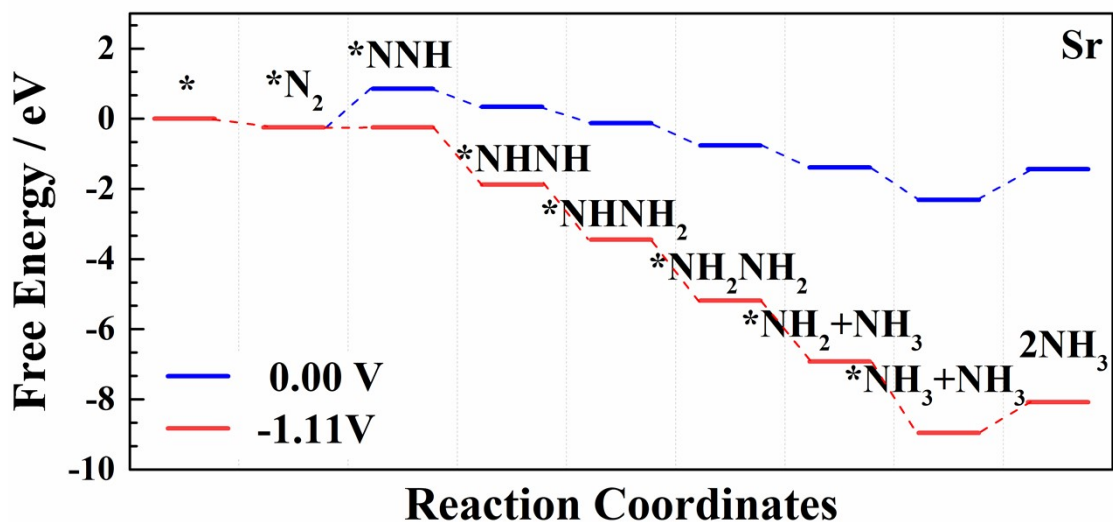

Figure S12. Free energy evolution process for Sr@GNR system.

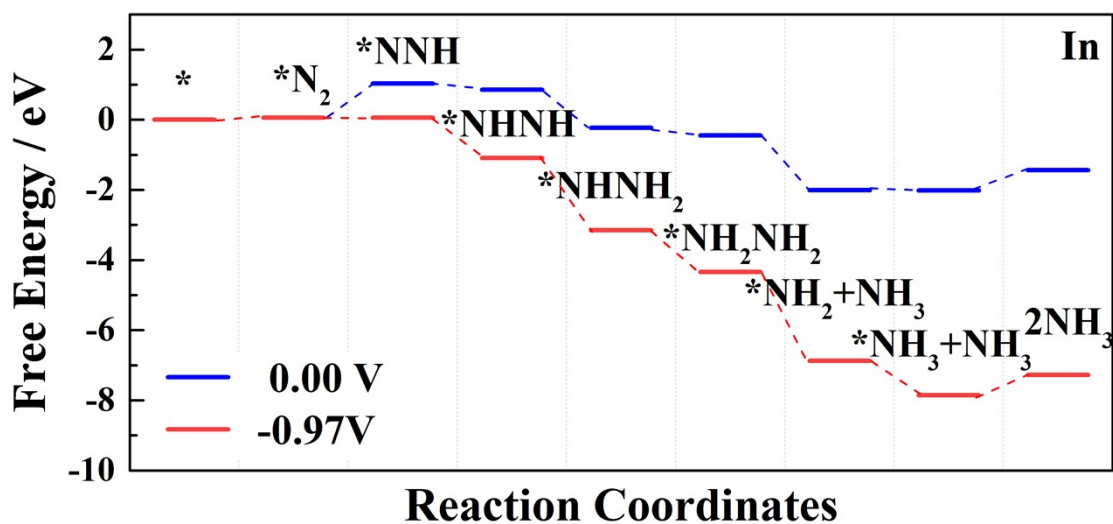

Figure S13. Free energy evolution process for In@GNR system.

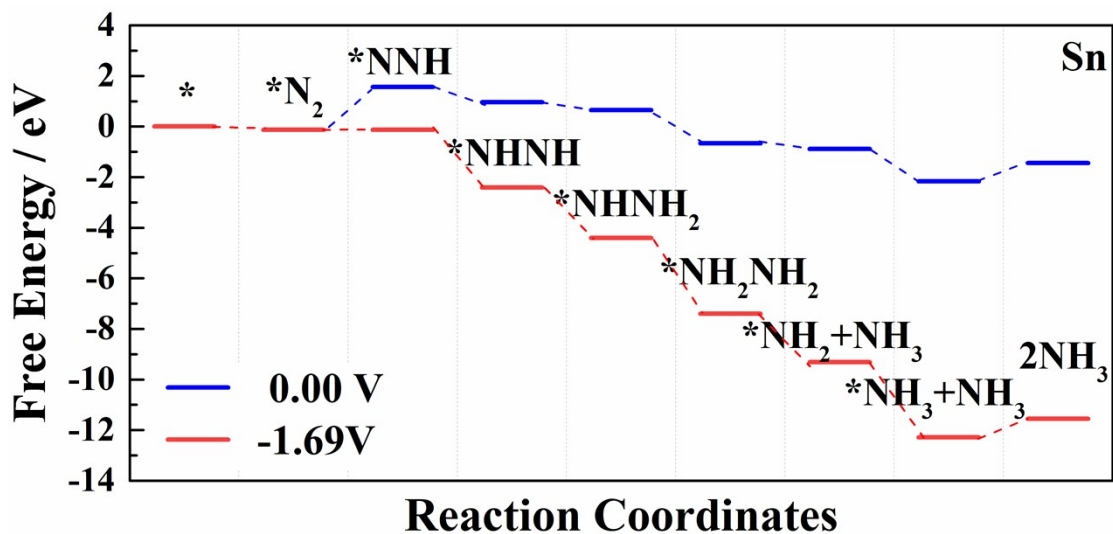

Figure S14. Free energy evolution process for Sn@GNR system.

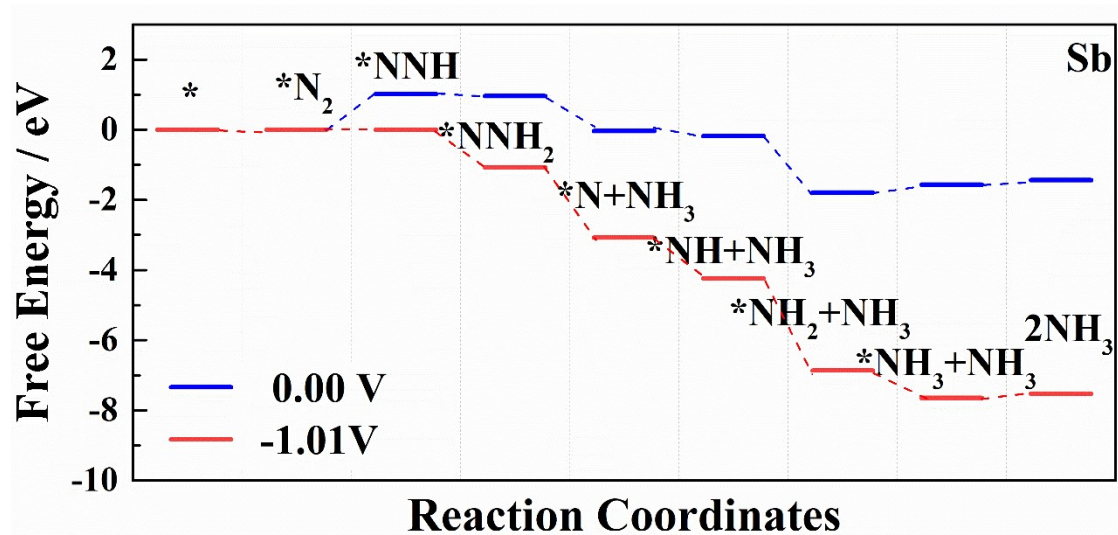

Figure S15. Free energy evolution process for Sb@GNR system.

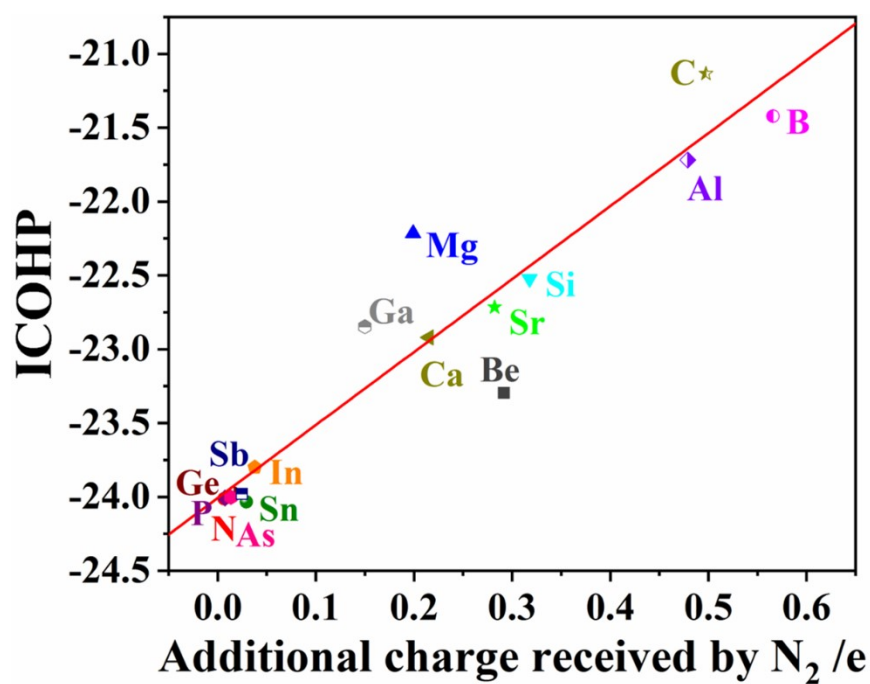

Figure S16. Linear relationship between the amount of charges received by the  $N_2$  and ICOHP of

N-N bond after  $N_2$  absorbed on the SAC substrate.



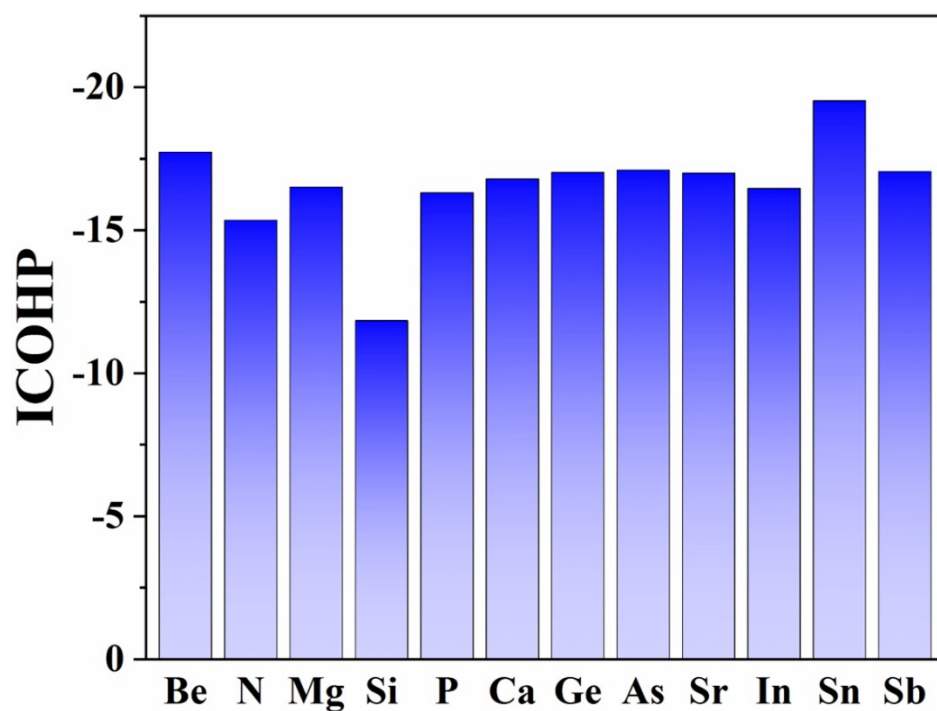

**Figure S17.** Integrated crystal orbital Hamilton population (ICOHP) of nitrogen-nitrogen bond for SAC-GNR\*NNH structure.

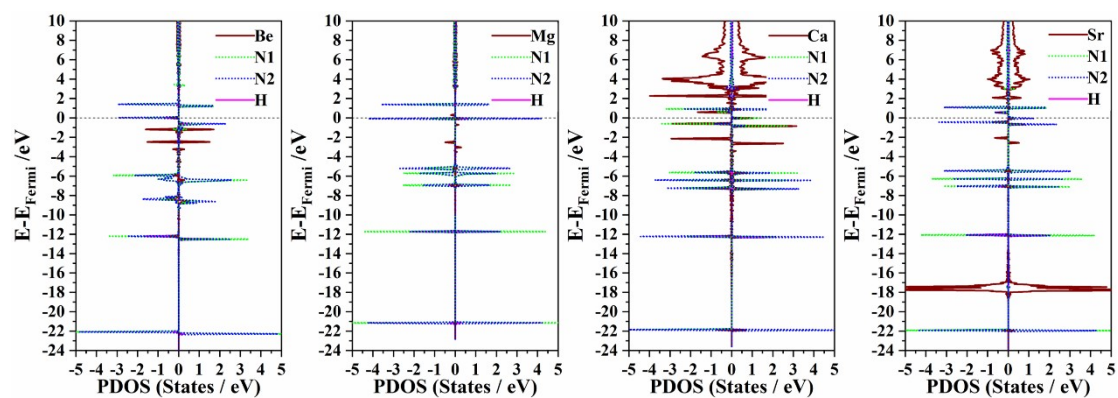

**Figure S18.** Partial density of states (PDOS) for NNH\*Be@GNR, NNH\*Mg@GNR, NNH\*Ca@GNR and NNH\*Sr@GNR structures.

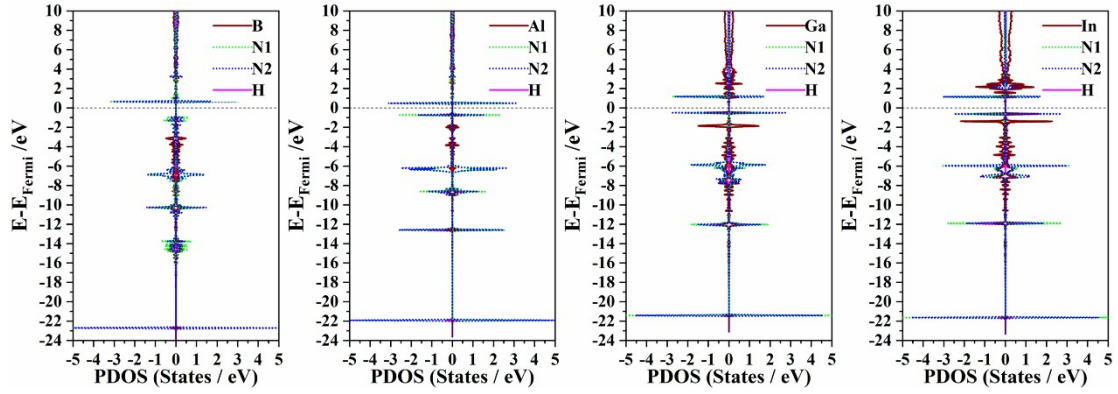

**Figure S19.** Partial density of states (PDOS) for NNH\*B@GNR, NNH\*Al@GNR, NNH\*Ga@GNR and NNH\*In@GNR structures.

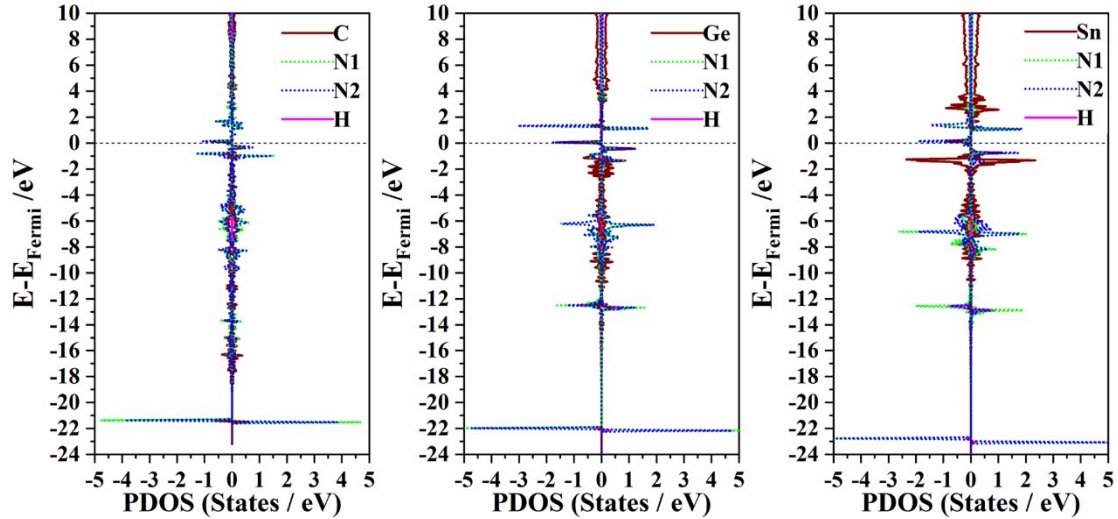

**Figure S20.** Partial density of states (PDOS) for NNH\*C@GNR, NNH\*Ge@GNR and NNH\*Sn@GNR structures.

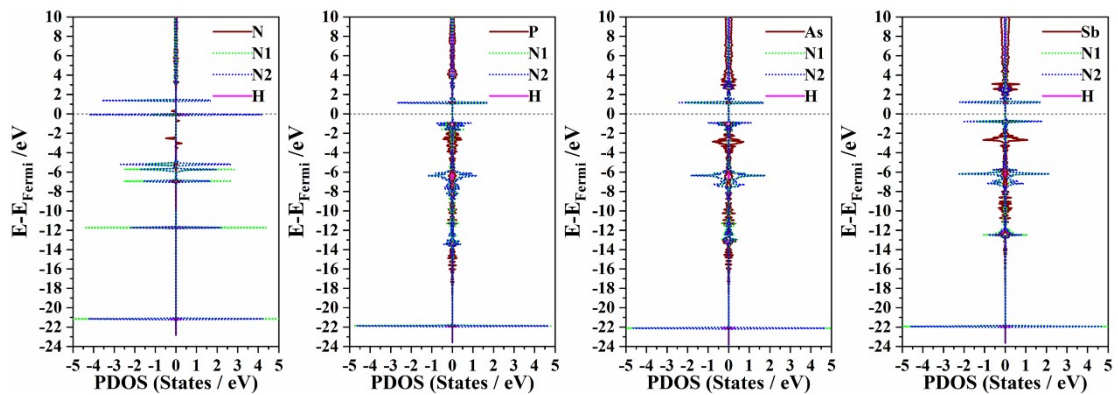

**Figure S21.** Partial density of states (PDOS) for NNH\*N@GNR, NNH\*P@GNR, NNH\*As@GNR and NNH\*Sb@GNR structures.

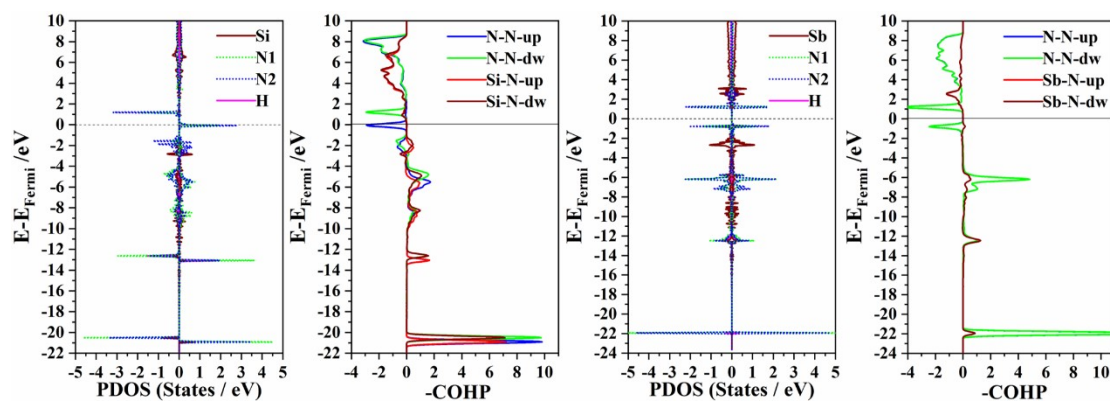

**Figure S22.** Partial density of states (PDOS) and Crystal occupation Hamiltonian population (COHP) for NNH\*Si@GNR and NNH\*Sb@GNR structures.

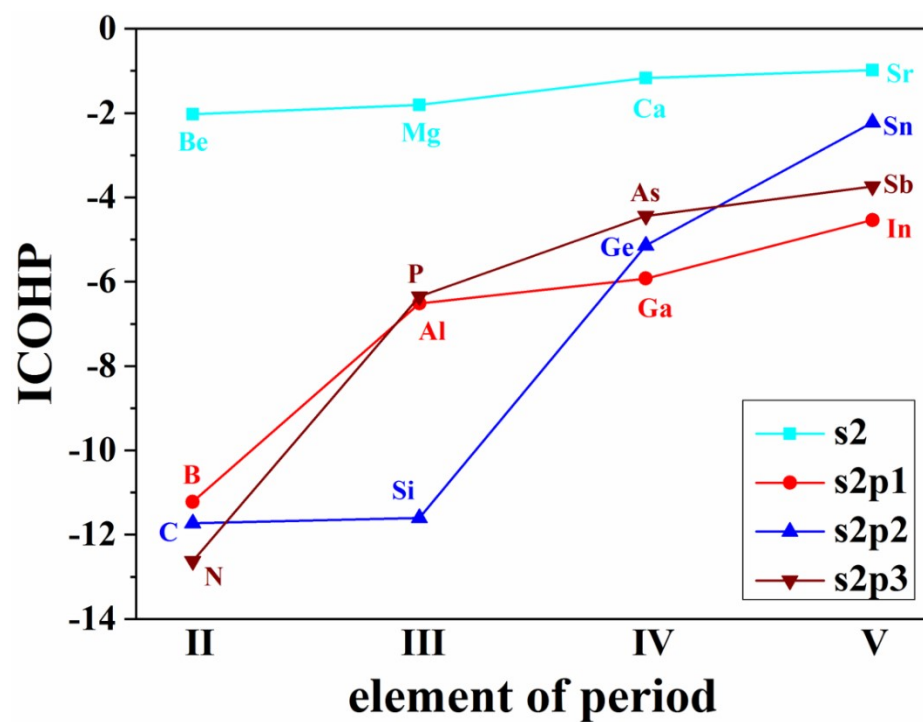

**Figure S23.** Integrated crystal orbital Hamiltonian population (ICOHP) of all SAC@GNR systems

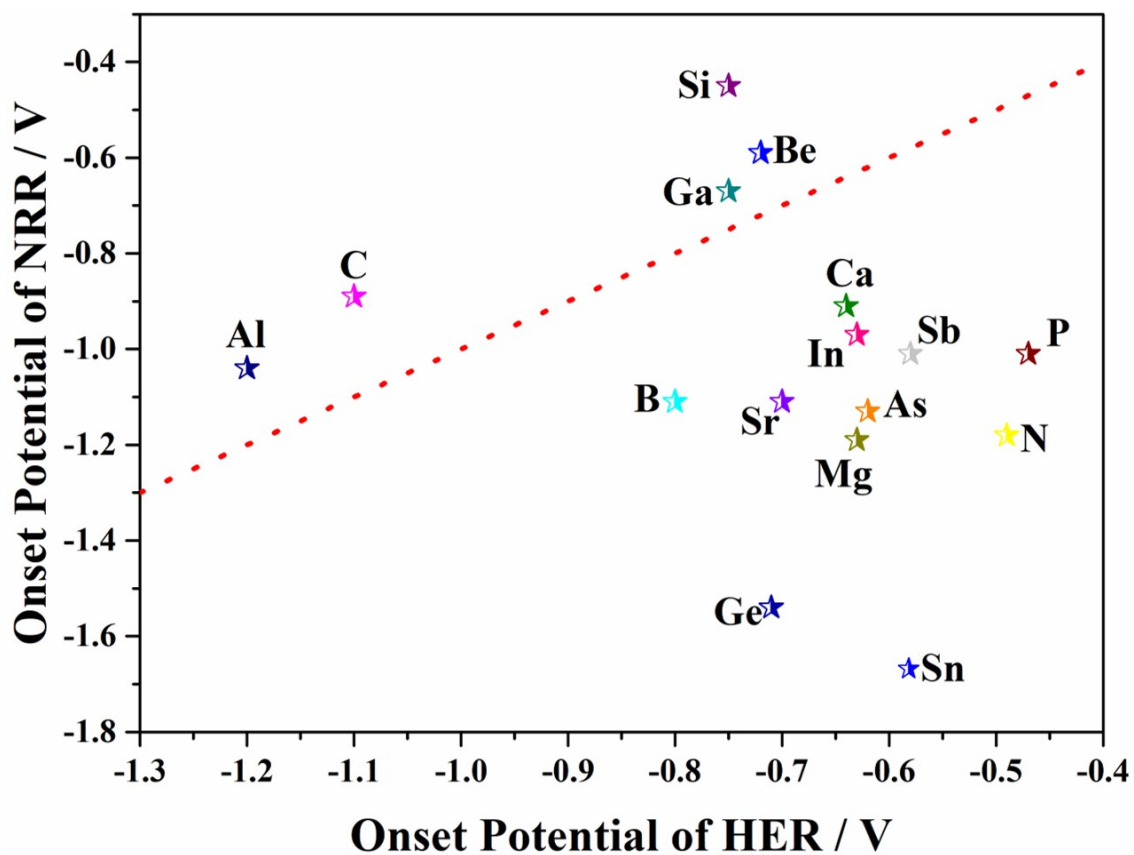

**Figure S24.** The comparison of the electrochemical performance for NRR and HER process. The dashed line represents HER and NRR share equal onset potentials while for elements below this line, the HER performance prevails NRR.
